# Supplementary material
Source: PubMed Central journal article supplement (PMC6050887)
Supplement: Supplemental_material.pdf [file Supplemental_material.pdf]

## Online Supplement

### Primary Angioplasty and Stenting May Be Superior to Thrombectomy on Acute Atherosclerotic Large Artery Occlusion

Dong Yang, MD<sup>1\*</sup>; Min Lin, MD, PhD<sup>2\*</sup>; Shuiping Wang, MD, PhD<sup>3\*</sup>; Huaiming Wang, MD<sup>1,4</sup>; Yonggang Hao, MD<sup>5,6</sup>; Wenjie Zi, MD, PhD<sup>7</sup>; Penghua Lv MD, PhD<sup>8</sup>; Dequan Zheng, MD<sup>9</sup>; Guodong Xiao, MD<sup>10</sup>; Gelin Xu, MD, PhD<sup>7</sup>; Yunyun Xiong, MD, PhD<sup>7</sup>; Xinfeng Liu, MD, PhD<sup>1,7</sup> on behalf of the ACTUAL Investigators

<sup>1</sup>Department of Neurology, Jinling Hospital, Second Military Medical University, Nanjing, Jiangsu Province 210002, China

<sup>2</sup>Department of Neurology, Fuzhou General Hospital of Nanjing Military Region, Fuzhou, Fujian Province 350025, China

<sup>3</sup>Department of Neurology, The 123rd Hospital of The People's Liberation Army, Bengbu, Anhui Province 233015, China

<sup>4</sup>Department of Neurology, The 89th Hospital of The People's Liberation Army, Weifang, Shandong Province 261021, China

<sup>5</sup>Department of Neurology, Jinling Hospital, Southern Medical University, Nanjing, Jiangsu Province 210002, China

<sup>6</sup>Department of Emergency Medicine, The First Affiliated Hospital of Soochow University, Suzhou, Jiangsu Province 215006, China

<sup>7</sup>Department of Neurology, Jinling Hospital, Medical School of Nanjing University, Nanjing, Jiangsu Province 210002, China

<sup>8</sup>Department of Interventional Radiology, Northern Jiangsu People's Hospital, Yangzhou, Jiangsu Province 225001, China.

<sup>9</sup>Department of Neurology, The 175th Hospital of The People's Liberation Army, The Affiliated Southeast Hospital of Xiamen University, Zhangzhou, Fujian Province 363000, China

<sup>10</sup>Department of Neurology, The Second Affiliated Hospital of Soochow University; Suzhou, Jiangsu Province 215004, China

\*The three authors contributed equally to this work.

Correspondence to:

Xinfeng Liu, MD, PhD

Department of Neurology, Jinling Hospital, Medical School of Nanjing University, 305 East Zhongshan Road, Nanjing, 210002, Jiangsu, China

Tel: +86 25 80860454

Fax: +86 25 84664563

E-mail: xfliu2@vip.163.com

Yunyun Xiong, MD, PhD

Department of Neurology, Jinling Hospital, Medical School of Nanjing University, 305 East  
Zhongshan Road, Nanjing, 210002, Jiangsu, China

Tel: +86 25 80863530

Fax: +86 25 84664563

E-mail: [caloriey@163.com](mailto:caloriey@163.com)

## **Supplemental S1**

### **ACTUAL investigators**

ACTUAL investigators are as follows: Xinfeng Liu, Gelin Xu, Yunyun Xiong, Wenjie Zi, Dong Yang, Huaiming Wang, Yonggang Hao, Department of Neurology, Jinling Hospital, Medical School of Nanjing University, Second Military Medical University, Southern Medical University, Nanjing, China; Yuxiu Liu, Department of Medical Statistics, Jinling Hospital, Medical School of Nanjing University; Meng Zhang, Chengchun Liu, Department of Neurology, Research Institute of Surgery, Daping Hospital, Third Military Medical University; Yu Geng, Zongjie Shi, Jinhua Zhang, Department of Neurology, Zhejiang Provincial People's Hospital; Hang Lin, Min Lin, Zhen Hu, Department of Neurology, Fuzhou General Hospital of Nanjing Military Region; Xiaorong Deng, Yue Wan, Department of Neurology, Hubei Zhongshan Hospital; Jiandong Zhang, Zhonghua Shi, Mirui Qu, Department of Neurosurgery, the 101st Hospital of the People's Liberation Army; Zhiming Zhou, Xianjun Huang, Department of Neurology, Yijishan Hospital of Wannan Medical College; Wei Wang, Department of Radiology, the First People's Hospital of Yangzhou, Yangzhou University; Haowen Xu, Tao Quan, Sheng Guan, Department of Neurology, the First Affiliated Hospital of Zhengzhou University; Xiguang Tian, Lin Chen, Department of Neurology, the Chinese Armed Police Force Guangdong Armed Police Corps Hospital; Penghua Lv, Xiaobo Li, Department of Interventional Radiology, Northern Jiangsu People's Hospital; Shuiping Wang, Shiquan Yang, Department of Neurology, the 123rd Hospital of the People's Liberation Army; Wenhua Liu, Dan Wei, Department of Neurology, Wuhan No.1 Hospital; Zhen Wang, Department of Neurology, Changsha Central Hospital; Xintong Liu, Department of Neurology, Guangdong Provincial No.2 People's Hospital; Fuqiang Guo, Shu Yang, Department of Neurology, Sichuan Provincial People's Hospital; Dequan Zheng, Xinyu Wu, Youfu Zeng, Department of Neurology, the 175th Hospital of the People's Liberation Army, the Affiliated Southeast Hospital of Xiamen University; Mingyi Tu, Department of Neurology, Hubei Wuchang Hospital; Ping Jin, Yong Liu, Department of Neurology, Lu'an Affiliated Hospital of Anhui Medical University; Hua Li, Jiayang Fang, Department of Neurology, the 476th Hospital of the People's Liberation Army; Guodong Xiao, Department of Neurology, the Second Affiliated Hospital of Soochow University.

## Supplemental Tables

**Table I. Stent devices used for primary angioplasty treatment**

| Type                                  | N=20     |
|---------------------------------------|----------|
| Self-expanding stent, no. (%)         | 16 (80%) |
| Precise (Cordis, USA), no. (%)        | 7 (35%)  |
| Solitaire AB (Covidien, USA), no. (%) | 5 (25%)  |
| Xact (Abbott, USA), no. (%)           | 2 (10%)  |
| Acculink (Abbott, USA), no. (%)       | 1 (5%)   |
| Protégé (EV3, USA), no. (%)           | 1 (5%)   |
| Balloon-mounted stent, no. (%)        | 4 (20%)  |
| Apollo (MicroPort, China), no. (%)    | 4 (20%)  |

All the devices have received China Food and Drug Administration (CFDA) approval.
